# Supplementary material for: Rosmarinic acid treatment during porcine oocyte maturation attenuates oxidative stress and improves subsequent embryo development in vitro
Source: PeerJ. 2019 Jun 18;7:e6930. doi: 10.7717/peerj.6930 (PMC6587974; doi:10.7717/peerj.6930)
Supplement: Data S1 — Raw data applied for data analyses and preparation for Figure 1A, 1B, 1C and 1D; Figure 2B and 2I; Figure 3A, 3B and 3D; Figure 4A and 4B; Figure 5B and Figure S1. [file peerj-07-6930-s002.xlsx]

## Sheet: Figure.1
	PBE rate （%）						Cleavage rate （%）						Blastocyst rate （%）						Hatching rate （%）
Re	Control	5 M	10 M	25 M		Re	Control	5 M	10 M	25 M		Re	Control	5 M	10 M	25 M		Re	Control	5 M	10 M	25 M
1	90.54	93.65	83.05	90.32		1	90.16	84.75	72.92	82.86		1	49.18	59.32	47.92	48.57		1	14.75	16.94	12.5	17.14
2	78.57	85.37	86.36	78.57		2	81.82	78.13	78.95	71.88		2	39.39	59.37	60.53	46.87		2	12.12	15.63	15.79	12.5
3	78.57	85.37	86.36	78.57		3	76	48.89	58.06	52.08		3	57.89	46.66	52.61	45.41		3	12	15.55	9.6	8.33
4	76.92	69.7	69.66	71.64		4	58.54	53.13	67.65	55.88		4	31.7	37.5	29.41	17.65		4	7.3	9.3	2.9	8.8
5	75.93	62.75	70.59	77.08		5	40.43	48.89	42.86	55		5	34.04	31.11	21.43	35		5	10.64	15.56	9.5	10
6	72.06	77.05	65.15	62.86		6	65.45	70.37	74.47	82.98		6	70.9	68.51	80.85	68.08		6	14.54	22.22	17.02	21.27
7	83.82	82.09	75.36	69.12		7	72.97	79.25	63.79	71.15		7	59.45	66.03	68.96	57.69		7	24.32	22.64	27.58	19.23
8	73.08	88.33	89.23	81.25		n	324	320	329	288		n	324	320	329	288		n	324	320	329	288
n	465	450	487	463		SEM	6.2	5.864	4.608	4.969		SEM	5.528	5.455	7.949	6.086		SEM	2.014	1.72	2.929	1.997
SEM	2.125	3.605	3.239	2.945		Mean	69.34	66.2	65.53	67.4		Mean	48.94	52.64	51.67	45.61		Mean	13.67	16.83	13.56	13.9
Mean	78.69	80.54	78.22	76.18														Paired t test（Control vs 5μM）
																		P value	0.027

## Sheet: Figure.2
	Diameter of blastocyst (μm)				Total cell number
Re	Control	RA		Re	Control	RA
1	192.8	203.2		1	38.36	41.19
2	173.16	218.32		2	36.63	42.29
3	177.28	199.13		3	41.33	45.63
4	178.19	200.9		n	45	52
n	67	92		SEM	38.77	43.04
SEM	4.29	4.39		Mean	1.37	1.34
Mean	180.4	205.4		Paired t test（Control vs RA）
Paired t test（Control vs RA）				P value	0.035
P value	0.041

## Sheet: Figure.3
	Cleavage rate（%）				Day 6 blastocyst rate（%）				Day 7 blastocyst rate（%）				Total cell number
Re	Control	RA		Re	Control	RA		Re	Control	RA		Re	Control	RA
1	70	76		1	21.43	24.29		1	21.43	25.71		1	39.57	42.25
2	71.15	73.58		2	22.22	21.92		2	23.61	24.66		2	37.46	38.87
3	64	67.31		3	18.57	20.83		3	21.43	22.22		3	37.75	39.87
n	212	215		n	212	215		n	212	215		n	39	46
SEM	2.217	2.589		SEM	1.109	1.02		SEM	0.726667	1.03377		SEM	0.66	1
Mean	68.38	72.3		Mean	20.74	22.3467		Mean	22.1567	24.1967		Mean	38.26	40.33
Paired t test（Control vs RA）				Paired t test（Control vs RA）				Paired t test（Control vs RA）				Unpaired t test（Control vs RA）
P value	0.068			P value	0.239			P value	0.211			P value	0.03

## Sheet: Figure.4
	Relative ROS levels in oocytes						Relative ROS levels in cumulus cells
Re	Control	RA	Mel			Re	Control	RA	Mel
1	0.85	0.69	0.638676			1	0.934647	0.571199	0.593745
2	1.11	0.81	0.819904			2	0.879201	0.667366	0.777108
3	1.04	0.85	0.736299			3	1.19238	0.820649	0.71407
SEM	0.07767	0.04807	0.05237			4	0.993774	0.84446	0.514947
Mean	1	0.7833	0.7316			SEM	0.07	0.07	0.05892
Paired t test（Control vs RA）			P=0.037			Mean	1	0.73	0.65
Paired t test（Control vs Mel）			P=0.011			Paired t test（Control vs RA）			P=0.016
Paired t test（RA vs Mel）			P=0.284			Paired t test（Control vs Mel）			P=0.029
						Paired t test（RA vs Mel）			P=0.485

## Sheet: Figure.5
	Relative GSH levels in oocytes
Re	Control	RA
1	1.03122	1.28323
2	0.784739	1.22256
3	1.18404	1.42904
SEM	0.12	0.06
Mean	1	1.31
Paired t test（Control vs RA）
P value	0.039

## Sheet: Figure.S1
	Relative ROS levels in oocytes
Re	Control	H2O2	RA+H2O2
1	0.920287	1.49664	1.2912
2	1.02409	1.44856	1.33197
3	1.05563	1.57107	1.49724
SEM	0.04088	0.03564	0.06299
Mean	1	1.50542	1.37347
Paired t test（Control vs H2O2）			0.0075
Paired t test（Control vs RA+H2O2）			0.0105
Paired t test（H2O2 vs RA+H2O2）			0.0765
